# Supplementary material
Source: Springer Nature journal article supplement (https://www.springermedizin.de/resource/supplementary/13063_2013_1534_MOESM3_ESM.pdf/9620226)
Supplement: MOESM3 [file 9620226]

## STOPIT- 1

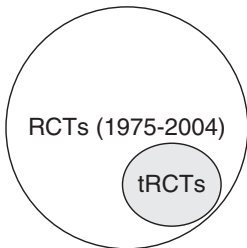

Epidemiology of tRCTs: 143 tRCT, 92 were published in high impact journals. The proportion of all RCTs published in high-impact journals that were stopped early for benefit increased with time.

## STOPIT- 2

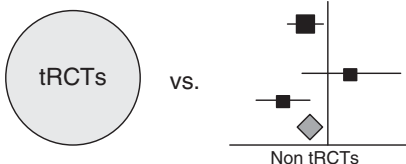

Empirical quantification of the average overestimation and its determinants: 91 tRCTs asking 63 different questions and 424 matching non-truncated RCTs. tRCT over-estimated the effect by 30% independent of the presence of a statistical stopping rule and the methodological quality of the studies.

## STOPIT- 3

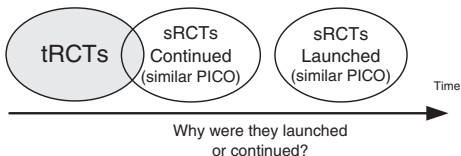

Epidemiology of sRCTs: 210 tRCT and all the sRCTs available (truncated or not)

### Summary of the STOPIT studies

**Abbreviations.-** RCT: Randomized controlled trial, sRCT: Subsequent randomized controlled trial, tRCT: Truncated randomized controlled trial
